# Supplementary material
Source: MDPI journal article supplement (https://www.mdpi.com/2227-9040/10/4/135)
Supplement: s1 [file s1 › chemosensors-1638987-supplementary.pdf]

# In<sub>2</sub>O<sub>3</sub> based hybrid materials: Interplay between microstructure, photoelectrical and light activated NO<sub>2</sub> sensor properties

Abulkosim Nasriddinov <sup>1,2</sup>, Sergey Tokarev <sup>1,3</sup>, Olga Fedorova <sup>1,3</sup>, Ivan Bozhev <sup>4,5</sup> and Marina Rumyantseva <sup>1\*</sup>

- <sup>1</sup> Chemistry Department, Moscow State University, 119991 Moscow, Russia;  
a.f.nasriddinov@gmail.com (A.N.); pergeybokarev@gmail.com (S.T.); fedorova@ineos.ac.ru (O.F.)  
<sup>2</sup> Faculty of Materials Science, Moscow State University, 119991 Moscow, Russia  
<sup>3</sup> A.N. Nesmeyanov Institute of Organoelement Compounds RAS, 119991 Moscow, Russia  
<sup>4</sup> Quantum Technology Center, Moscow State University, 119991 Moscow, Russia;  
bozhjev.ivan@physics.msu.ru  
<sup>5</sup> Faculty of Physics, Moscow State University, 119991 Moscow, Russia  
\* Correspondence: roum@inorg.chem.msu.ru; Tel.: +7-495-939-5471

## Synthesis of Ru(II) complex

The synthesis of heteroleptic Ru(II) complex bis(2,2'-bipyridine-*k*<sup>2</sup>N<sup>1</sup>,N<sup>1'</sup>) [2-(2,2'-bithiophen-5-yl)-1H-imidazo[4,5-f][1,10]phenanthroline-*k*<sup>2</sup>N<sup>7</sup>,N<sup>8</sup>) ruthenium(2+) dichloride (RuTT) was carried out according to Scheme 1. The first stage was the oxidation of 1,10-phenanthroline with KBrO<sub>3</sub> to provide phenetrolene-6,10-dione [1]. Condensation reactions of the aldehydes with phenetrolene-6,10-dione gave the ligand as a bright crystalline compound with good yield of 77% [2, 3]. To prepare the RuTT complex an equimolar mixture of the ligand with Ru(bpy)<sub>3</sub>Cl<sub>2</sub> (*cis*-bis(2,2-bipyridine)dichlororuthenium II hydrate) was kept in ethanol at 80°C in sealed ampoule in argon for 8 h [4]. After complete reaction, the crude complex was purified by column chromatography. The yield was 41%.

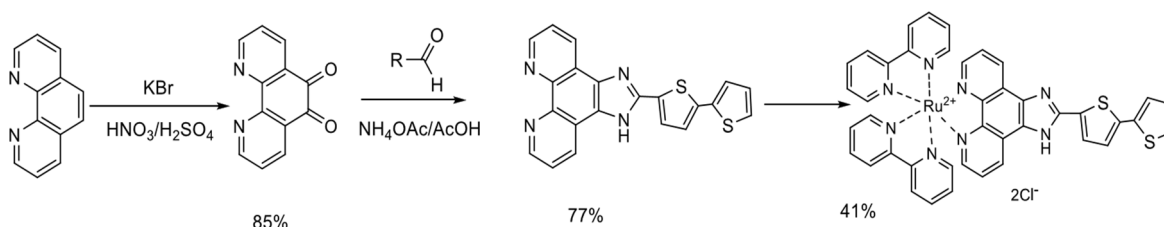

**Scheme S1.** Synthesis of Ru (II) complex.

## References

- Shuzhang, X.; Tao, Y.; Yifeng, Z.; Zhao, Q.; Fuyou, L.; Chunhui, H. Multi-state molecular switches based on dithienylperfluorocyclopentene and imidazo[4,5-f][1,10]phenanthroline. *Tetrahedron*, **2006**, 62, 10072-10078.
- Batista, R.M.F.; Costa, S.P.G.; Belsley, M.; Lodeiro, C.; Raposo, M.M.M. Synthesis and characterization of novel (oligo)thienyl-imidazo-phenanthrolines as versatile p-conjugated systems for several optical applications. *Tetrahedron*, **2008**, 64, 9230-9238.
- Cai, Z.; Zhou, M.; Xu, J. Degenerate four-wave mixing determination of third-order optical nonlinear of three mixed ligand nickel (II) complexes. *J. Mol. Struct.*, **2011**, 1006, 282-287.
- Li, Z.; Yang, H.; Zhang, A.; Luo, H.; Wang, K. pH effects on optical and DNA binding properties of a thiophene-containing ruthenium(II) complex. *Inorg. Chim. Acta*, **2011**, 370, 132-140.
